# Supplementary material for: Species-specific histological characterizations of renal tubules and collecting ducts in the kidneys of cats and dogs
Source: PubMed Central journal article supplement (PMC11221681; doi:10.1371/journal.pone.0306479), 2024-07-03
Supplement: pone.0306479.s001.pdf [file pone.0306479.s001.pdf]

**Supplemental Table 1. The list of antibodies used in this study.**

| Purpose   | Antigen                                  | Host   | Dilution  | Source                                     | Retrieval                    | Blocking           |
|-----------|------------------------------------------|--------|-----------|--------------------------------------------|------------------------------|--------------------|
|           | Tamm-<br>Horsfall<br>protein 1<br>(THP1) |        | 1:400     | Santa Cruz,<br>Texas, USA                  | CB<br>115 °C<br>15 min       |                    |
| Primary   | Calbindin-<br>D28K<br>(CD28K)            | Rabbit | 1:1000    | Proteintech,<br>Tokyo, Japan               | Tris-HCl<br>115 °C 15<br>min | 10 % goat<br>serum |
|           | Aquaporin 2<br>(AQP2)                    |        | 1:800     | Alpha<br>Diagnostic Intl,<br>Texas, USA    |                              |                    |
| Secondary | Rabbit-IgG<br>(biotinylated)             | Goat   | Undiluted | SABRO(R) Kit,<br>Nichirei, Tokyo,<br>Japan | Not applicable               |                    |

CB, 10 mM citrate buffer (pH 6.0). Tris-HCl, 20 mM Tris-HCl (pH 9.0).
