# Supplementary material for: Species-specific histological characterizations of renal tubules and collecting ducts in the kidneys of cats and dogs
Source: PubMed Central journal article supplement (PMC11221681; doi:10.1371/journal.pone.0306479), 2024-07-03
Supplement: pone.0306479.s002.pdf [file pone.0306479.s002.pdf]

**Supplemental Table 2. The list of lectins used in this study.**

| Lectin                                                      | Abbreviation |
|-------------------------------------------------------------|--------------|
| <i>Concanavalin A</i>                                       | ConA         |
| <i>Soybean agglutinin Glycine max (soybean) seeds</i>       | SBA          |
| <i>Wheat germ agglutinin Triticum vulgaris</i>              | WGA          |
| <i>Dolichos biflorus agglutinin</i>                         | DBA          |
| <i>Ulex europaeus agglutinin I</i>                          | UEA-I        |
| <i>Ricinus communis agglutinin I seeds</i>                  | RCA-I        |
| <i>Peanut agglutinin Arachis hypogaea peanuts</i>           | PNA          |
| <i>Griffonia simplicifolia lectin I</i>                     | GSL-I        |
| <i>Pisum sativum agglutinin</i>                             | PSA          |
| <i>Lens culinaris agglutinin</i>                            | LCA          |
| <i>Phaseolus vulgaris Erythroagglutinin</i>                 | PHA-E        |
| <i>Phaseolus vulgaris Leucoagglutinin</i>                   | PHA-L        |
| <i>Sophora japonica</i>                                     | SJA          |
| Succinylated Wheat Germ Agglutinin <i>Triticum vulgaris</i> | s-WGA        |
| <i>Griffonia simplicifolia II</i>                           | GSL-II       |
| <i>Datura stramonium Lectin</i>                             | DSL          |
| <i>Erythrina cristagalli Lectin</i>                         | ECL          |
| Jacalin <i>Artocarpus integrifolia</i> Seeds                | Jacalin      |
| <i>Lycopersicon esculentum Lectin</i>                       | LEL          |
| <i>Solanum tuberosum Lectin</i>                             | STL          |
| <i>Vicia villosa Lectin</i>                                 | VVA          |
